# Supplementary material for: Synthesis, characterization and sorption studies of a zirconium(iv) impregnated highly functionalized mesoporous activated carbons
Source: Royal Society of Chemistry journal article supplement (doi:10.1039/c9ra10103a), 2020-01-01
Supplement: c9ra10103a1.pdf [file c9ra10103a1.pdf]

### Supplementary Data

#### **Synthesis, characterization and sorption studies of Zirconium (IV) impregnated highly functionalized mesoporous sorbent**

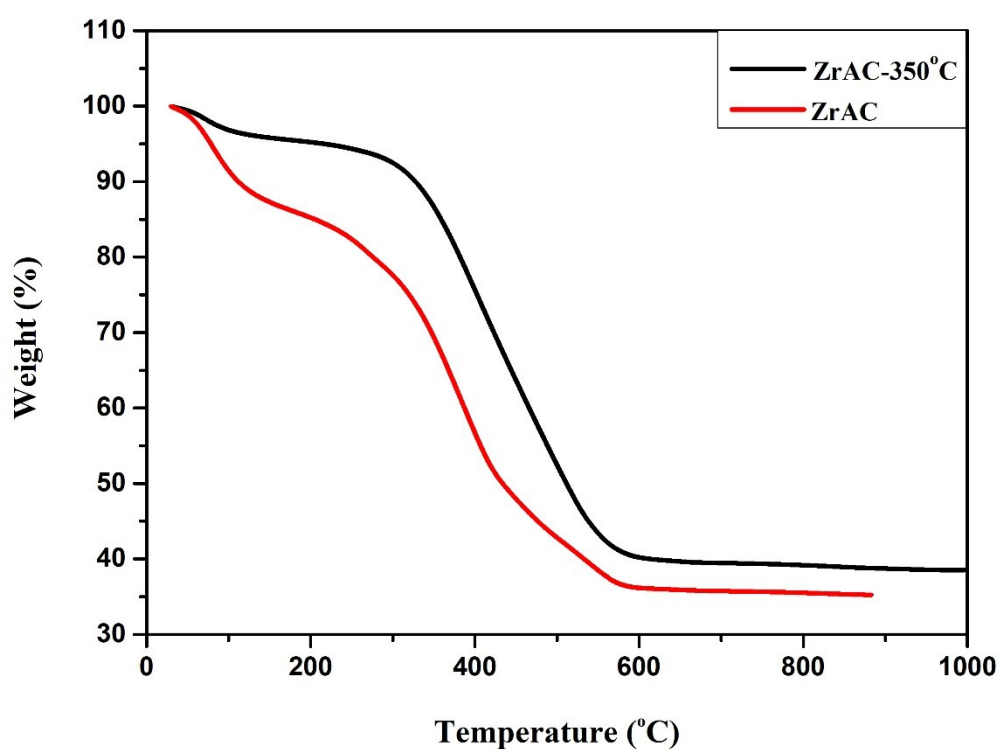

**Figure S1: Thermal characteristics of heat-treated ZrAC\_350°C and ZrAC.**

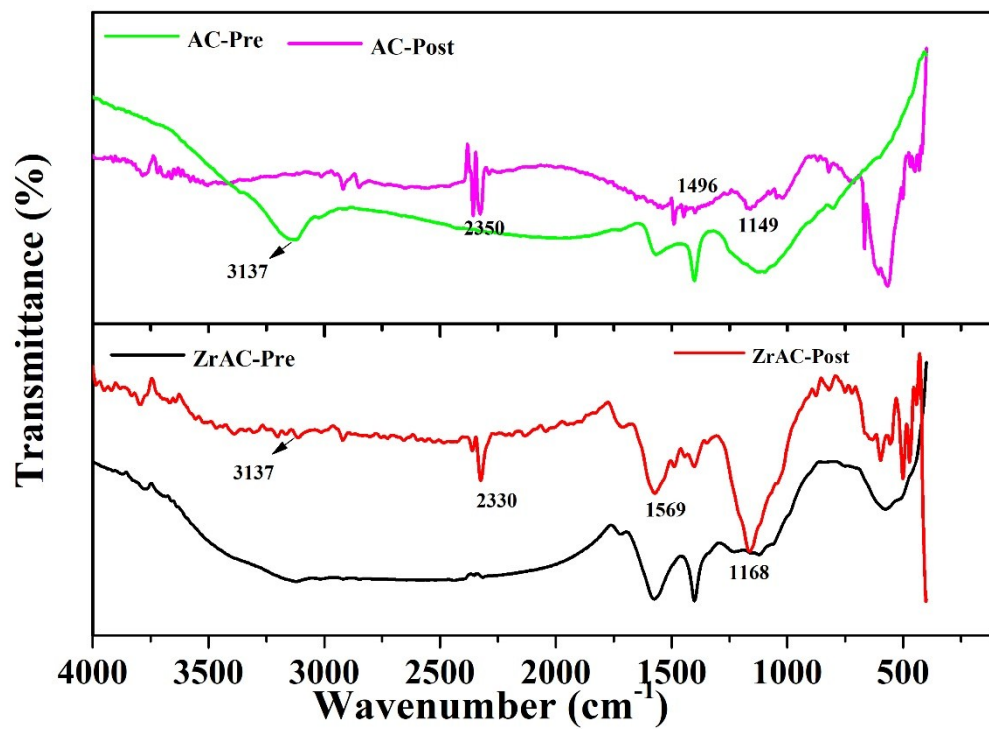

**Figure S2: FTIR spectra of AC and ZrAC after adsorption of Reactive Blue 19**

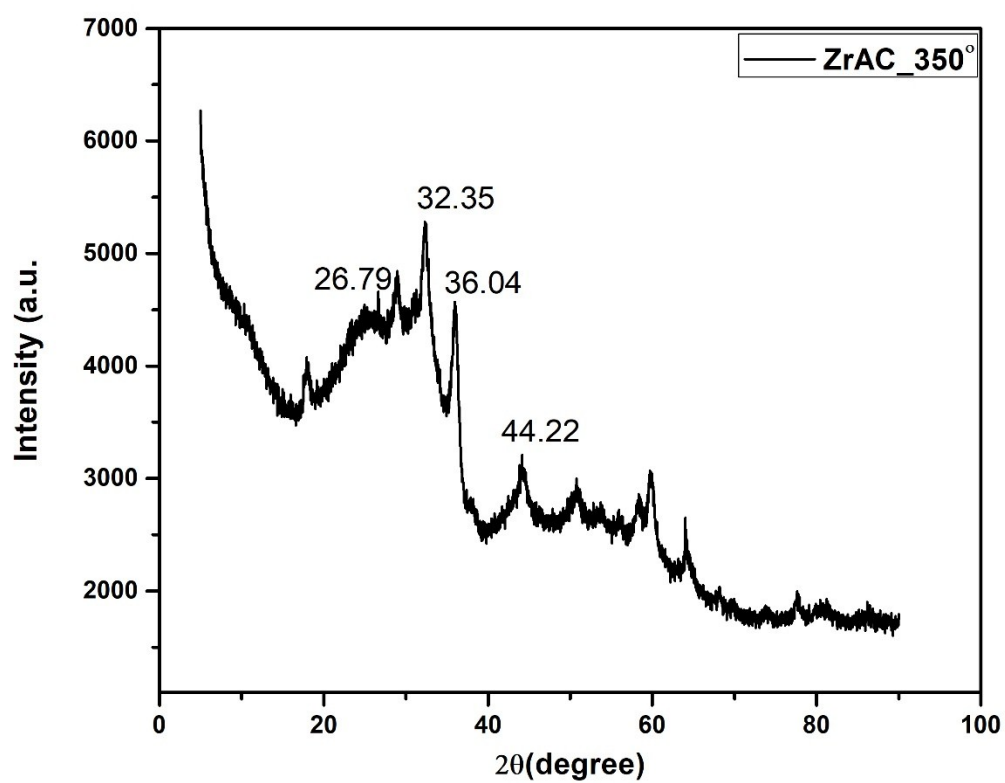

**Figure S3: XRD diffraction pattern for heat-treated ZrAC at 350°C (ZrAC\_350°C) and ZrAC.**

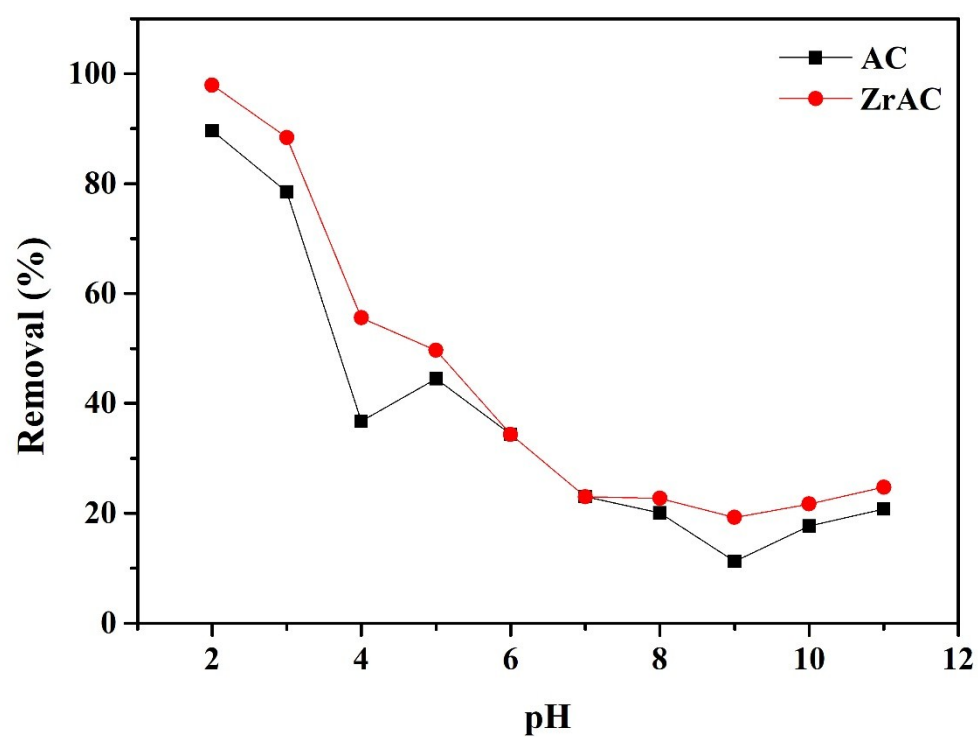

**Figure S4: Effect of pH on the removal of Reactive Blue 19**

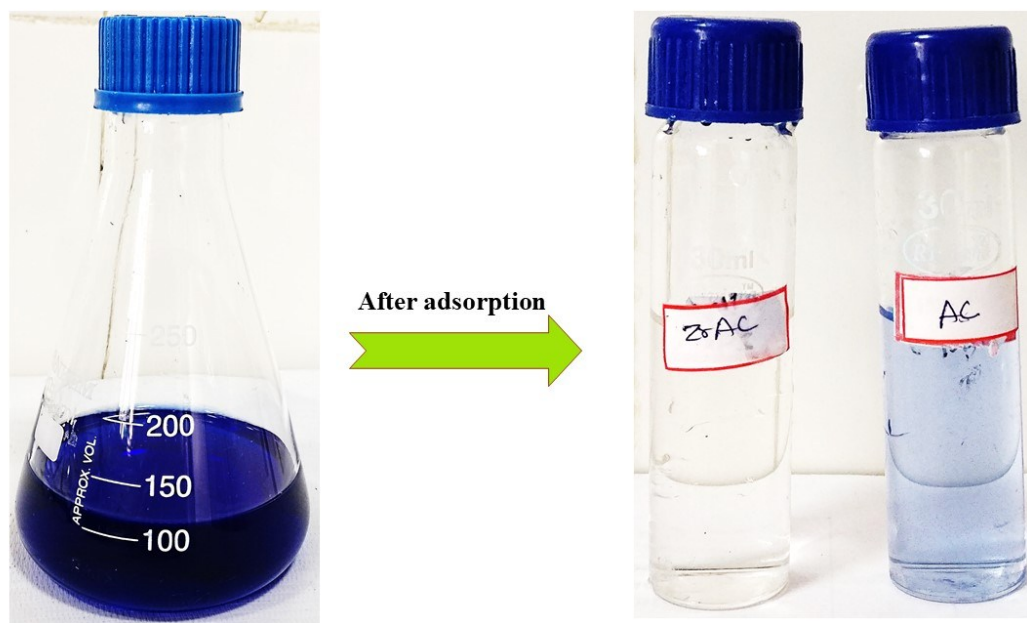

**Figure S5: Experimental result: Adsorption difference of AC and ZrAC**

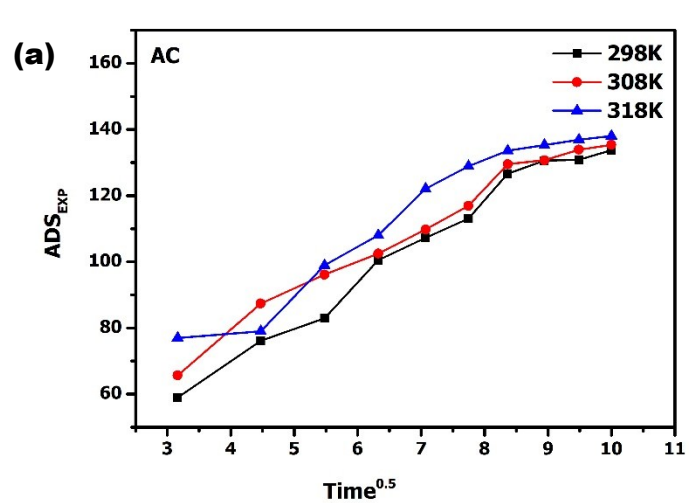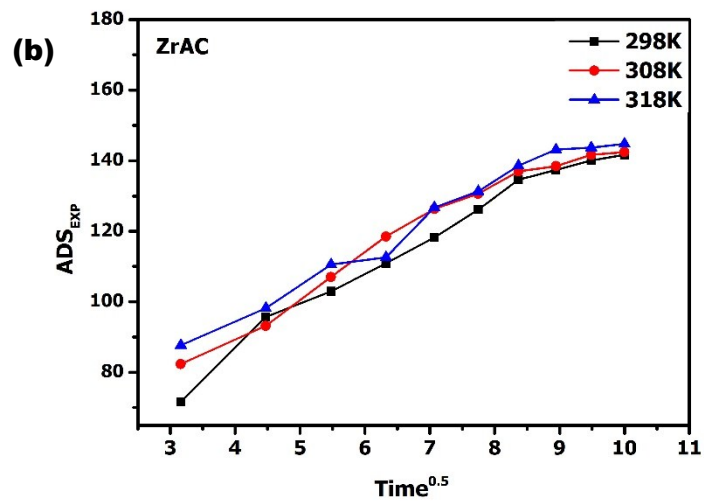

**Figure S6: Intraparticle diffusion model of (a) AC and (b) ZrAC.**

**Table S1: EDX composition (weight %) of the elements present in AC and ZrAC.**

| Samples | Weight (%) of elements |       |      |      |      |       |                             |
|---------|------------------------|-------|------|------|------|-------|-----------------------------|
|         | C                      | O     | Cl   | K    | Mn   | Zr    | Others including Si, N, etc |
| AC      | 85.33                  | 12.56 | -    | 0.68 | -    | -     | 1.53                        |
| ZrAC    | 49.85                  | 25.25 | 0.12 | 0.17 | 5.43 | 14.11 | 5.07                        |

**Table S2: Concentration of Zirconium on ZrAC before and after the adsorption using ICP-MS**

| <b>Adsorbent</b> | <b>Zr Concentration (mg/gm)</b> |
|------------------|---------------------------------|
| ZrAC-Pre         | 92.43 ±5                        |
| ZrAC-Post        | 86.49±5                         |
